# Supplementary material
Source: PubMed Central journal article supplement (PMC8295897)
Supplement: jamapsychiatry-e211862-s004.pdf [file jamapsychiatry-e211862-s004.pdf]

## Data Sharing Statement

Goldin. Evaluation of Cognitive Behavioral Therapy vs Mindfulness Meditation in Brain Changes During Reappraisal and Acceptance Among Patients With Social Anxiety Disorder. *JAMA Psychiatry*. Published July 21, 2021. doi:10.1001/jamapsychiatry.2021.1862

### Data

**Data available:** Yes

**Data types:** Deidentified participant data

**How to access data:** Please send requests for data to [philippegoldin@gmail.com](mailto:philippegoldin@gmail.com)

**When available:** With publication

### Supporting Documents

**Document types:** Other (please specify)

**Additional Information:** study design and data analysis plan is published here: Open Science Framework pre-registration link: [https://osf.io/j8uy5/?view\\_only=97e15b7e2ac04e2499043ebb560dc3a0](https://osf.io/j8uy5/?view_only=97e15b7e2ac04e2499043ebb560dc3a0)

**How to access documents:** Open Science Framework pre-

registration link: [https://osf.io/j8uy5/?view\\_only=97e15b7e2ac04e2499043ebb560dc3a0](https://osf.io/j8uy5/?view_only=97e15b7e2ac04e2499043ebb560dc3a0)

**When available:** beginning date: 03-15-2018

### Additional Information

**Who can access the data:** researchers whose proposed use of the data has been approved by James Gross and Philippe Goldin

**Types of analyses:** Analysis of negative emotion ratings and fMRI BOLD signal data

**Mechanisms of data availability:** researchers whose proposed use of the data has been approved
